# Supplementary material
Source: PubMed Central journal article supplement (PMC4479050)
Supplement: 97320630011207S1.pdf [file 97320630011207S1.pdf]

## Supplementary material:

**Table 1:** Lists of OxPhos genes and DNA-Met genes

|                      |                                                                                                                                                                                                                                                                                                                                                                                                                                                                                                                                                                                                                                                                                                                                                                                       |
|----------------------|---------------------------------------------------------------------------------------------------------------------------------------------------------------------------------------------------------------------------------------------------------------------------------------------------------------------------------------------------------------------------------------------------------------------------------------------------------------------------------------------------------------------------------------------------------------------------------------------------------------------------------------------------------------------------------------------------------------------------------------------------------------------------------------|
| <b>OxPhos genes</b>  | ATP5A1, ATP5B, ATP5C1, ATP5D, ATP5E, ATP5F1, ATP5G1, ATP5G2, ATP5G3, ATP5H, ATP5I, ATP5J, ATP5J2, ATP5L, ATP5O, ATP5S, COX4I1, COX5A, COX5B, COX6B1, COX6C, COX7A2, COX7B, COX7C, COX8A, CYC1, CYCS, NDUFA1, NDUFA10, NDUFA11, NDUFA12, NDUFA13, NDUFA2, NDUFA3, NDUFA4, NDUFA5, NDUFA6, NDUFA7, NDUFA8, NDUFA9, NDUFAB1, NDUFB10, NDUFB11, NDUFB2, NDUFB3, NDUFB4, NDUFB5, NDUFB6, NDUFB7, NDUFB8, NDUFB9, NDUFC1, NDUFC2, NDUFS1, NDUFS2, NDUFS3, NDUFS4, NDUFS5, NDUFS6, NDUFS7, NDUFS8, NDUFV1, NDUFV2, NDUFV3, SDHA, SDHB, SDHC, SDHD, UQCR10/CRC, UQCR11/UQCR, UQCRB, UQCRCL, UQCRF2, UQCRFS1, UQCRH, UQCRQ                                                                                                                                                                     |
| <b>DNA-Met genes</b> | GPR24, TLE6, STAB1, PPYR1, CTNNA2, ST6GALNAC1, C1orf35, IQCH, SOX1, HAMP, KTI12, EHHADH, RAB20, C1orf80, MOCS3, BMS1L, NR2E1, BBS7, PCDHB14, FBXL13, ZNF454, SMUG1, C16orf61, KCNQ1, FGF22, NHN1, MAWBP, CCDC60, CNN3, GLI1, ADAMTSL3, IVL, PCDHB3, HSPA12B, C21orf99, CETN3, PCDHB10, SRXN1, TREML2, MGC50559, FLJ14346, ALDOA, FLJ45909, SUPT5H, BATF2, DZIP1, CLDN1, OSBPL11, GTF3C1, GPR6, ARHGAP22, IL17RE, CALML4, LOC339789, P2RXL1, FLJ20364, DPPA3, CNFN, PGAM2, LOC203427, TMEPAL, GRIN2C, GAPDHS, PCDH21, PROCA1, PIGV, APITD1, NPAS1, GAL3ST4, KLK11, ZNF555, TXNL4A, APC, UTF1, PRPS1, FSIP1, SHCBP1, ZNF659, MAPK8IP3, OSBPL8, CDK9, UBR1, MEA1, DAB2IP, IMMT, BRDG1, TLX3, NCALD, TMBIM1, C17orf80, TJAP1, TAF1, LOC389458, MAP2K1IP1, GALR2, COPS6, TCF7L2, CA2, SORD |

**Table 2:** Genes with annotations representing "oxidative phosphorylation" and "ubiquitin-proteasome" in 300 genes of top highest ES scores obtained by modified "expression screening" on **A) BD\_Brain** and **B) BD\_Blood1** with OxPhos genes as a target gene set.

### 2A: BD\_Brain

| ES rank | Entrez Gene ID | Gene Symbol | Annotation | ES score | FDR  |
|---------|----------------|-------------|------------|----------|------|
| 9       | 1329           | COX5B       | OxPhos     | 0.76     | 0.01 |
| 10      | 4724           | NDUFS4      | OxPhos     | 0.76     | 0.00 |
| 17      | 1347           | COX7A2      | OxPhos     | 0.76     | 0.00 |
| 22      | 4708           | NDUFB2      | OxPhos     | 0.75     | 0.00 |
| 28      | 27089          | UQCRQ       | OxPhos     | 0.75     | 0.00 |
| 39      | 7319           | UBE2A       | ubiquitin  | 0.75     | 0.01 |
| 45      | 5705           | PSMC5       | ubiquitin  | 0.74     | 0.00 |
| 52      | 4700           | NDUFA6      | OxPhos     | 0.74     | 0.00 |
| 71      | 5688           | PSMA7       | ubiquitin  | 0.74     | 0.00 |
| 72      | 51506          | UFC1        | ubiquitin  | 0.74     | 0.01 |
| 75      | 539            | ATP5O       | OxPhos     | 0.74     | 0.01 |
| 78      | 5694           | PSMB6       | ubiquitin  | 0.73     | 0.03 |
| 83      | 7381           | UQCRB       | OxPhos     | 0.73     | 0.00 |
| 86      | 5707           | PSMD1       | ubiquitin  | 0.73     | 0.00 |
| 91      | 5710           | PSMD4       | ubiquitin  | 0.73     | 0.00 |
| 96      | 4695           | NDUFA2      | OxPhos     | 0.73     | 0.02 |
| 101     | 9551           | ATP5J2      | OxPhos     | 0.73     | 0.02 |
| 114     | 4706           | NDUFAB1     | OxPhos     | 0.73     | 0.02 |
| 128     | 55012          | PPP2R3C     | ubiquitin  | 0.72     | 0.01 |
| 142     | 515            | ATP5F1      | OxPhos     | 0.72     | 0.02 |
| 146     | 514            | ATP5E       | OxPhos     | 0.72     | 0.00 |
| 168     | 1349           | COX7B       | OxPhos     | 0.72     | 0.01 |
| 169     | 5521           | PPP2R2B     | ubiquitin  | 0.72     | 0.03 |
| 172     | 5693           | PSMB5       | ubiquitin  | 0.72     | 0.01 |
| 190     | 522            | ATP5J       | OxPhos     | 0.72     | 0.05 |
| 210     | 4701           | NDUFA7      | OxPhos     | 0.72     | 0.02 |
| 217     | 5686           | PSMA5       | ubiquitin  | 0.72     | 0.07 |
| 222     | 5690           | PSMB2       | ubiquitin  | 0.72     | 0.01 |
| 239     | 5706           | PSMC6       | ubiquitin  | 0.71     | 0.02 |
| 256     | 5687           | PSMA6       | ubiquitin  | 0.71     | 0.02 |
| 260     | 5708           | PSMD2       | ubiquitin  | 0.71     | 0.04 |
| 261     | 7321           | UBE2D1      | ubiquitin  | 0.71     | 0.03 |
| 264     | 10632          | ATP5L       | OxPhos     | 0.71     | 0.02 |
| 265     | 10476          | ATP5H       | OxPhos     | 0.71     | 0.02 |
| 274     | 5692           | PSMB4       | ubiquitin  | 0.71     | 0.01 |

|     |      |        |           |      |      |
|-----|------|--------|-----------|------|------|
| 276 | 5695 | PSMB7  | ubiquitin | 0.71 | 0.04 |
| 284 | 4728 | NDUFS8 | OxPhos    | 0.71 | 0.04 |
| 285 | 4725 | NDUFS5 | OxPhos    | 0.71 | 0.06 |

## 2B: BD\_Blood1

| ES rank | Entrez Gene ID | Gene Symbol | Annotation | ES score | FDR  |
|---------|----------------|-------------|------------|----------|------|
| 6       | 29796          | UCRC        | OxPhos     | 0.72     | 0.00 |
| 9       | 4708           | NDUFB2      | OxPhos     | 0.72     | 0.00 |
| 17      | 5695           | PSMB7       | ubiquitin  | 0.71     | 0.00 |
| 18      | 5527           | PPP2R5C     | ubiquitin  | 0.71     | 0.00 |
| 24      | 521            | ATP5I       | OxPhos     | 0.71     | 0.00 |
| 33      | 5701           | PSMC2       | ubiquitin  | 0.70     | 0.00 |
| 34      | 5689           | PSMB1       | ubiquitin  | 0.70     | 0.00 |
| 42      | 5684           | PSMA3       | ubiquitin  | 0.70     | 0.00 |
| 44      | 8239           | USP9X       | ubiquitin  | 0.70     | 0.00 |
| 55      | 4694           | NDUFA1      | OxPhos     | 0.69     | 0.00 |
| 63      | 7320           | UBE2B       | ubiquitin  | 0.69     | 0.00 |
| 70      | 522            | ATP5J       | OxPhos     | 0.69     | 0.00 |
| 90      | 55967          | NDUFA12     | OxPhos     | 0.68     | 0.00 |
| 97      | 7347           | UCHL3       | ubiquitin  | 0.68     | 0.02 |
| 100     | 5694           | PSMB6       | ubiquitin  | 0.68     | 0.01 |
| 131     | 1350           | COX7C       | OxPhos     | 0.67     | 0.01 |
| 148     | 5683           | PSMA2       | ubiquitin  | 0.66     | 0.00 |
| 173     | 4714           | NDUFB8      | OxPhos     | 0.65     | 0.02 |
| 244     | 7311           | UBA52       | ubiquitin  | 0.64     | 0.00 |
| 259     | 4705           | NDUFA10     | OxPhos     | 0.64     | 0.02 |
| 280     | 51103          | NDUFAF1     | ubiquitin  | 0.63     | 0.02 |

**Table 3:** GO terms representing “oxidative phosphorylation” and “ubiquitin-proteasome” obtained by modified “expression screening” on BD\_Brain and BD\_Blood1 with OxPhos genes as a target gene set.

|                                                   | BD_Brain*         | BD_Blood1*        |
|---------------------------------------------------|-------------------|-------------------|
| GO terms representing “oxidative phosphorylation” | <i>GO:0006119</i> | <i>GO:0006119</i> |
|                                                   | <i>GO:0006120</i> | <i>GO:0006120</i> |
|                                                   | <i>GO:0015980</i> | <i>GO:0015980</i> |
|                                                   | <i>GO:0022900</i> | <i>GO:0022900</i> |
|                                                   | <i>GO:0022904</i> | <i>GO:0022904</i> |
|                                                   | <i>GO:0042773</i> | <i>GO:0042773</i> |
|                                                   | <i>GO:0042775</i> | <i>GO:0042775</i> |
|                                                   | <i>GO:0006754</i> |                   |
|                                                   | <i>GO:0010257</i> |                   |
|                                                   | <i>GO:0015986</i> |                   |
|                                                   | <i>GO:0032981</i> |                   |
|                                                   | <i>GO:0033108</i> |                   |
|                                                   | <i>GO:0046034</i> |                   |
|                                                   | <i>GO:0055114</i> |                   |
| GO terms representing “ubiquitin-proteasome”      | <i>GO:0006511</i> | <i>GO:0006511</i> |
|                                                   | <i>GO:0010498</i> | <i>GO:0010498</i> |
|                                                   | <i>GO:0031145</i> | <i>GO:0031145</i> |
|                                                   | <i>GO:0031396</i> | <i>GO:0031396</i> |
|                                                   | <i>GO:0031397</i> | <i>GO:0031397</i> |
|                                                   | <i>GO:0031398</i> | <i>GO:0031398</i> |
|                                                   | <i>GO:0043161</i> | <i>GO:0043161</i> |
|                                                   | <i>GO:0051436</i> | <i>GO:0051436</i> |
|                                                   | <i>GO:0051437</i> | <i>GO:0051437</i> |
|                                                   | <i>GO:0051438</i> | <i>GO:0051438</i> |
|                                                   | <i>GO:0051439</i> | <i>GO:0051439</i> |
| <i>GO:0051443</i>                                 | <i>GO:0051443</i> |                   |
| <i>GO:0051444</i>                                 | <i>GO:0051444</i> |                   |
|                                                   | <i>GO:0033522</i> |                   |

\*GO terms of *italic bold* were observed in both BD\_Brain and BD\_Blood1

**Table 4:** GO terms representing “inflammatory response” and “apoptosis” obtained by modified “expression screening” on BD\_Blood1 and BD\_Blood2 with DNA-Met genes as a target gene set.

|                                               | BD_Blood1*        | BD_Blood2*        |
|-----------------------------------------------|-------------------|-------------------|
| GO terms representing “inflammatory response” | <i>GO:0006952</i> | <i>GO:0006952</i> |
|                                               | <i>GO:0006955</i> | <i>GO:0006955</i> |
|                                               | <i>GO:0002263</i> | <i>GO:0002684</i> |
|                                               | <i>GO:0002285</i> | <i>GO:0002694</i> |
|                                               | <i>GO:0002312</i> | <i>GO:0006968</i> |
|                                               | <i>GO:0002313</i> | <i>GO:0009615</i> |
|                                               | <i>GO:0002335</i> | <i>GO:0009617</i> |
|                                               | <i>GO:0002366</i> | <i>GO:0042742</i> |
|                                               | <i>GO:0002429</i> | <i>GO:0050729</i> |
|                                               | <i>GO:0002474</i> | <i>GO:0050778</i> |
|                                               | <i>GO:0042113</i> | <i>GO:0050863</i> |
|                                               | <i>GO:0045321</i> |                   |
|                                               | <i>GO:0046649</i> |                   |
| GO terms representing “apoptosis”             | <i>GO:0006915</i> | <i>GO:0006915</i> |
|                                               | <i>GO:0010942</i> | <i>GO:0010942</i> |
|                                               | <i>GO:0043065</i> | <i>GO:0043065</i> |
|                                               | <i>GO:0043068</i> | <i>GO:0043068</i> |
|                                               | <i>GO:0006917</i> | <i>GO:0010941</i> |
|                                               | <i>GO:0008219</i> | <i>GO:0012501</i> |
|                                               | <i>GO:0012501</i> | <i>GO:0042981</i> |
|                                               | <i>GO:0012502</i> | <i>GO:0043067</i> |
|                                               | <i>GO:0016265</i> |                   |

\*GO terms of *italic bold* were observed in both BD\_Blood1 and BD\_Blood2.
